# Supplementary material for: Identification of immune-associated biomarker for predicting lung adenocarcinoma: bioinformatics analysis and experiment verification of PTK6
Source: Springer Nature journal article supplement (doi:10.1007/s12672-024-00939-9), 2024-04-04

A

PTK6  
46kDa

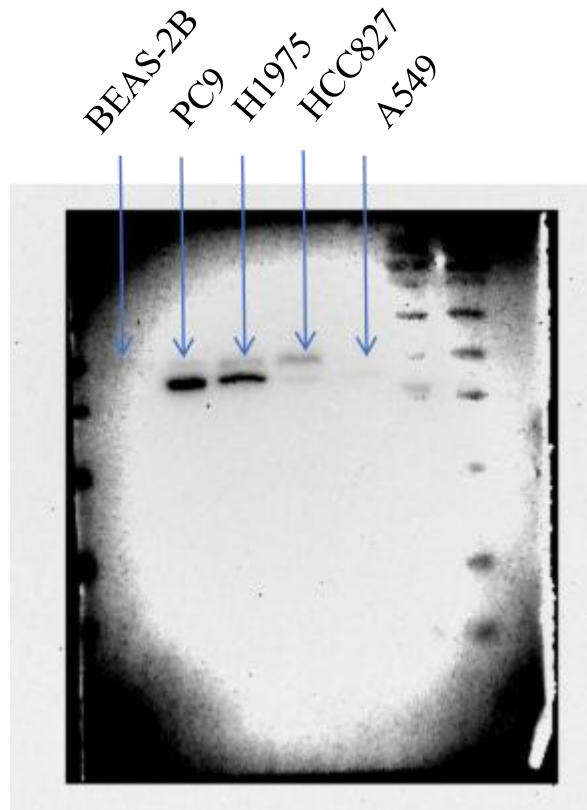

B

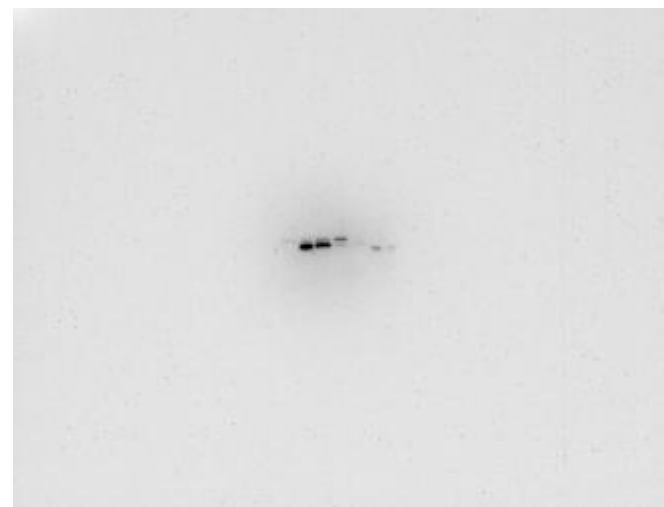

C

$\beta$ -Tubulin  
55kDa

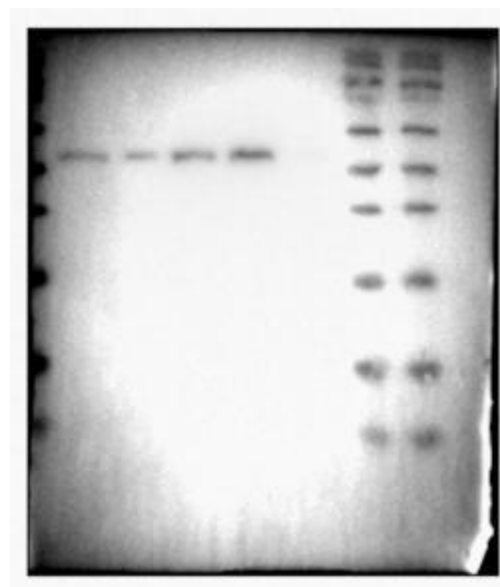

D

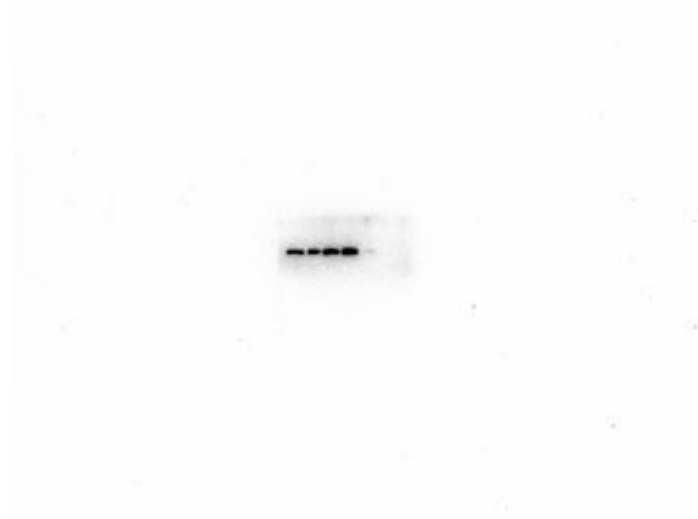

A

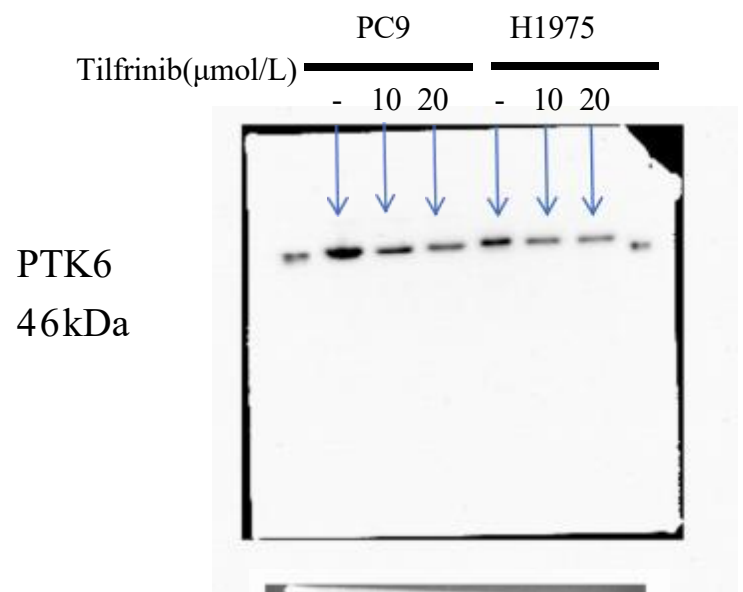

B

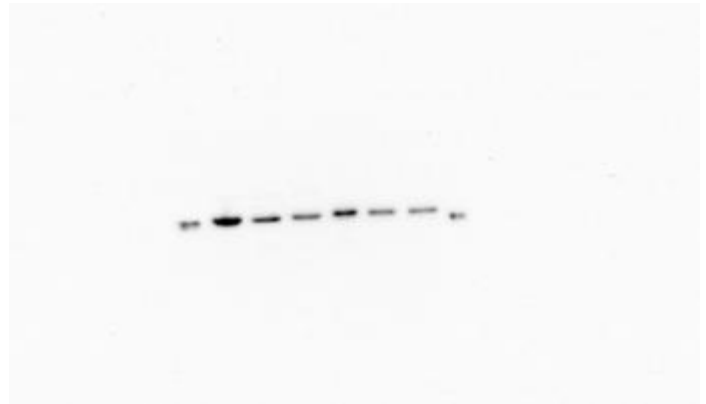

C

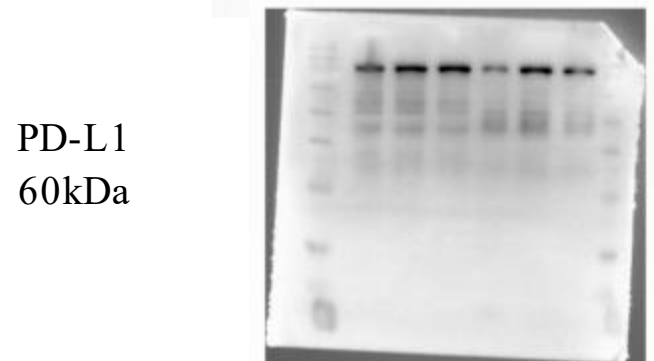

D

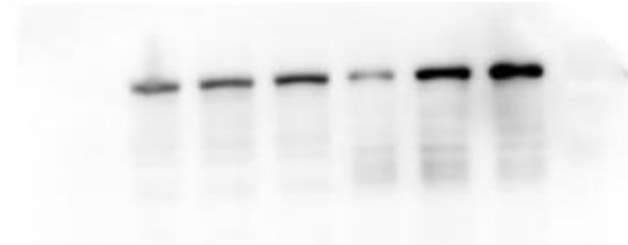

E

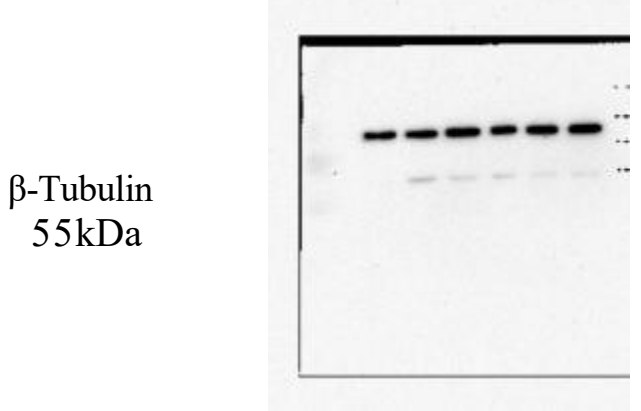

F

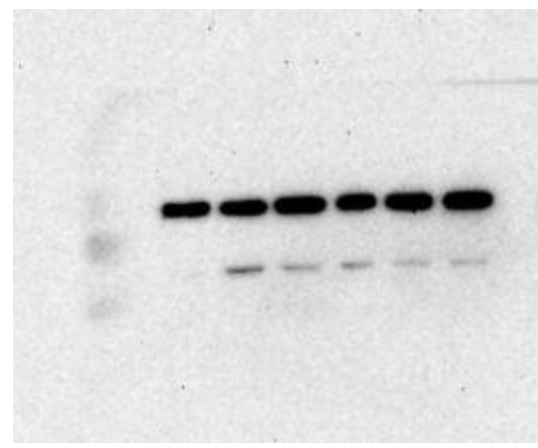

Supplement: MOESM2 [file 12672_2024_939_MOESM2_ESM.pdf]
